# Supplementary material for: Functional genomics atlas of synovial fibroblasts defining rheumatoid arthritis heritability
Source: PubMed Central journal article supplement (PMC8385949; doi:10.1186/s13059-021-02460-6), 2021-08-25
Supplement: 13059_2021_2460_MOESM4_ESM.pdf [file 13059_2021_2460_MOESM4_ESM.pdf]

**Dataset S2.** Known motif enrichment analysis using HOMER at enhancer sites with open chromatin (as defined by ATAC-seq).

STIMULATED ATAC-seq peaks

cut-off p-value = 1.00E-04

**CHiC up/RNA up**

| Rank | Motif                                                                             | Name                                             | P-value  | log P-pvalue | q-value (Benjamini) | # Target Sequences with Motif | % of Targets Sequences with Motif | # Back-ground Sequences with Motif | % of Back-ground Sequences with Motif |
|------|-----------------------------------------------------------------------------------|--------------------------------------------------|----------|--------------|---------------------|-------------------------------|-----------------------------------|------------------------------------|---------------------------------------|
| 1    |  | AP-1(bZIP)/ThioMac-PU.1-ChIP-Seq(GSE21512)/Homer | 1.00E-12 | -2.97E+01    | 0                   | 45                            | 20.83%                            | 2901.5                             | 5.90%                                 |
| 2    |  | Atf3(bZIP)/GBM-ATF3-ChIP-Seq(GSE33912)/Homer     | 1.00E-10 | -2.35E+01    | 0                   | 38                            | 17.59%                            | 2576.3                             | 5.24%                                 |
| 3    |  | BATF(bZIP)/Th17-BATF-ChIP-Seq(GSE39756)/Homer    | 1.00E-08 | -1.91E+01    | 0                   | 34                            | 15.74%                            | 2494.7                             | 5.07%                                 |
| 4    |  | Fra1(bZIP)/BT549-Fra1-ChIP-Seq(GSE46166)/Homer   | 1.00E-06 | -1.58E+01    | 0                   | 28                            | 12.96%                            | 2061.2                             | 4.19%                                 |
| 5    |  | Fosl2(bZIP)/3T3L1-Fosl2-ChIP-Seq(GSE56872)/Homer | 1.00E-04 | -1.10E+01    | 0.0011              | 18                            | 8.33%                             | 1274.9                             | 2.59%                                 |

**CHiC up/RNA down**

| Rank | Motif                                                                               | Name                                              | P-value  | log P-pvalue | q-value (Benjamini) | # Target Sequences with Motif | % of Targets Sequences with Motif | # Back-ground Sequences with Motif | % of Back-ground Sequences with Motif |
|------|-------------------------------------------------------------------------------------|---------------------------------------------------|----------|--------------|---------------------|-------------------------------|-----------------------------------|------------------------------------|---------------------------------------|
| 1    |   | AP-1(bZIP)/ThioMac-PU.1-ChIP-Seq(GSE21512)/Homer  | 1.00E-24 | -5.62E+01    | 0                   | 76                            | 23.31%                            | 2904.8                             | 5.89%                                 |
| 2    |  | Atf3(bZIP)/GBM-ATF3-ChIP-Seq(GSE33912)/Homer      | 1.00E-21 | -5.02E+01    | 0                   | 67                            | 20.55%                            | 2511.4                             | 5.09%                                 |
| 3    |  | Fra1(bZIP)/BT549-Fra1-ChIP-Seq(GSE46166)/Homer    | 1.00E-19 | -4.52E+01    | 0                   | 57                            | 17.48%                            | 2008.9                             | 4.07%                                 |
| 4    |  | BATF(bZIP)/Th17-BATF-ChIP-Seq(GSE39756)/Homer     | 1.00E-17 | -4.02E+01    | 0                   | 60                            | 18.40%                            | 2473.5                             | 5.01%                                 |
| 5    |  | Fosl2(bZIP)/3T3L1-Fosl2-ChIP-Seq(GSE56872)/Homer  | 1.00E-12 | -2.82E+01    | 0                   | 34                            | 10.43%                            | 1147.5                             | 2.32%                                 |
| 6    |  | Jun-AP1(bZIP)/K562-cJun-ChIP-Seq(GSE31477)/Homer  | 1.00E-09 | -2.25E+01    | 0                   | 26                            | 7.98%                             | 846.1                              | 1.71%                                 |
| 7    |  | Bach2(bZIP)/OCILy7-Bach2-ChIP-Seq(GSE44420)/Homer | 1.00E-04 | -1.12E+01    | 0.0006              | 16                            | 4.91%                             | 668.4                              | 1.35%                                 |
| 8    |  | CEBP(bZIP)/ThioMac-CEBPb-ChIP-Seq(GSE21512)/Homer | 1.00E-04 | -9.37E+00    | 0.0034              | 40                            | 12.27%                            | 3191.3                             | 6.47%                                 |
